# Supplementary material for: Atypical Familial Amyotrophic Lateral Sclerosis with Slowly Progressing Lower Extremities-predominant Late-onset Muscular Weakness and Atrophy
Source: PubMed Central journal article supplement — Intern Med. 2019 Jul 1;58(13):1851–8. doi: 10.2169/internalmedicine.2222-18 (PMC6663526; doi:10.2169/internalmedicine.2222-18), 2019-07-01
Supplement: 1349-7235-58-1851-s001.pdf [file 1349-7235-58-1851-s001.pdf]

| Chromoso | Region    | Type      | Reference | Allele | Zygoty       |
|----------|-----------|-----------|-----------|--------|--------------|
| 1        | 2441557   | SNV       | C         | T      | Heterozygous |
| 1        | 7797589   | Deletion  | A         | -      | Heterozygous |
| 1        | 7890069   | SNV       | C         | T      | Heterozygous |
| 1        | 109394866 | SNV       | T         | C      | Heterozygous |
| 1        | 151379728 | Insertion | -         | T      | Heterozygous |
| 1        | 158908273 | SNV       | G         | C      | Heterozygous |
| 1        | 180023062 | Insertion | -         | A      | Heterozygous |
| 2        | 73784436  | SNV       | G         | A      | Heterozygous |
| 2        | 95952931  | Insertion | -         | A      | Heterozygous |
| 2        | 220354194 | Insertion | -         | C      | Heterozygous |
| 3        | 49395678  | MNV       | CC        | GG     | Heterozygous |
| 3        | 98503874  | SNV       | G         | C      | Heterozygous |
| 4        | 3133499   | SNV       | C         | T      | Heterozygous |
| 4        | 5733312   | SNV       | C         | A      | Heterozygous |
| 5        | 137621817 | SNV       | C         | T      | Heterozygous |
| 5        | 179069957 | Insertion | -         | AG     | Heterozygous |
| 6        | 31922379  | MNV       | CT        | TC     | Heterozygous |
| 6        | 33147231  | Insertion | -         | G      | Heterozygous |
| 6        | 161469775 | Insertion | -         | A      | Heterozygous |
| 6        | 167754563 | SNV       | C         | A      | Heterozygous |
| 7        | 139268736 | Insertion | -         | G      | Heterozygous |
| 8        | 62212438  | SNV       | G         | A      | Heterozygous |
| 8        | 145005749 | SNV       | G         | A      | Heterozygous |
| 9        | 37746469  | SNV       | C         | G      | Heterozygous |
| 10       | 134010607 | Deletion  | TGCCGT    | -      | Heterozygous |
| 11       | 1247464   | SNV       | G         | A      | Heterozygous |
| 11       | 74109201  | Insertion | -         | C      | Heterozygous |
| 14       | 94203633  | SNV       | C         | T      | Heterozygous |
| 14       | 94578113  | Deletion  | C         | -      | Heterozygous |
| 15       | 75132030  | SNV       | G         | A      | Heterozygous |
| 16       | 56368666  | Deletion  | G         | -      | Heterozygous |
| 17       | 7330170   | SNV       | C         | G      | Heterozygous |
| 17       | 7812675   | SNV       | C         | G      | Heterozygous |
| 17       | 40128774  | MNV       | TC        | AA     | Heterozygous |
| 17       | 41610607  | Insertion | -         | G      | Heterozygous |
| 18       | 24126882  | SNV       | A         | G      | Heterozygous |
| 18       | 24126886  | SNV       | A         | C      | Heterozygous |
| 19       | 1621970   | Deletion  | C         | -      | Heterozygous |
| 19       | 1621970   | MNV       | CT        | TG     | Heterozygous |
| 19       | 2280741   | SNV       | T         | C      | Heterozygous |
| 19       | 15651383  | SNV       | G         | A      | Heterozygous |
| 19       | 17306197  | SNV       | G         | A      | Heterozygous |
| 19       | 21992360  | SNV       | T         | G      | Heterozygous |
| 19       | 38964327  | MNV       | GC        | CG     | Heterozygous |
| 19       | 41349879  | SNV       | T         | C      | Heterozygous |
| 19       | 43429907  | SNV       | A         | G      | Heterozygous |
| 19       | 44771144  | SNV       | G         | A      | Heterozygous |
| 19       | 46318091  | SNV       | G         | A      | Heterozygous |
| 19       | 48807246  | Insertion | -         | CTGC   | Heterozygous |
| 19       | 52941908  | SNV       | C         | T      | Heterozygous |
| 19       | 53015217  | SNV       | G         | A      | Heterozygous |
| 19       | 55295164  | SNV       | A         | C      | Heterozygous |
| 21       | 34924024  | Deletion  | C         | -      | Heterozygous |
| 22       | 50657144  | Insertion | -         | TCG    | Heterozygous |

Coding.region.change

ENST00000505228:c.[\*96G>A]; ENST00000378466:c.[1978G>A]; ENST00000502512:c.[\*96G>A]; ENST00000435556:c.[1861G>A]  
ENST00000303635:c.[3617delA]; ENST00000439411:c.[3617delA]; ENST00000495233:c.[485delA]  
ENST00000361923:c.[3035C>T]; ENST00000377532:c.[3062C>T]  
ENST00000370001:c.[421A>G]; ENST00000369995:c.[421A>G]; ENST00000369994:c.[421A>G]; ENST00000472781:c.[421A>G]; ENST00000474186:c.[421A>G]; ENST00000461774:c.[421A>G]; ENST00000357393:c.[115-2668A>G]  
ENST00000361398:c.[2255\_2256insA]; ENST00000540984:c.[500\_501insA]; ENST00000491586:c.[2282\_2283insA]; ENST00000531094:c.[2228\_2229insA]; ENST00000392723:c.[2255\_2256insA]; ENST00000409503:c.[2387\_2388insA]; ENST  
ENST00000368135:c.[352G>C]; ENST00000392254:c.[352G>C]; ENST00000392252:c.[325G>C]; ENST00000458222:c.[352G>C]; ENST00000368140:c.[352G>C]; ENST00000368138:c.[325G>C]  
ENST00000367607:c.5167\_5168insA  
ENST00000423048:c.[\*587G>A]; ENST00000264448:c.[10165G>A]; ENST00000409009:c.[10039G>A]  
ENST00000542147:c.[1998\_1999insA]; ENST00000431567:c.[\*1626\_\*1627insA]; ENST00000317620:c.[2145\_2146insA]; ENST00000403131:c.[2145\_2146insA]; ENST00000317668:c.[2145\_2146insA]  
ENST00000312358:c.8454\_8455insC  
ENST00000419349:c.[33\_34delGinsCC]; ENST00000419783:c.[33\_34delGinsCC]  
ENST00000485145:c.[163G>C]; ENST00000483910:c.[421G>C]; ENST00000265261:c.[78-3006G>C]; ENST00000497008:c.[336-3006G>C]; ENST00000486334:c.[421G>C]; ENST00000497621:c.[\*554G>C]; ENST00000394162:c.[421G>C]  
ENST00000355072:c.2233C>T  
ENST00000509451:c.[545C>A]; ENST00000264956:c.[545C>A]; ENST00000382674:c.[545C>A]  
ENST00000357274:c.[1037G>A]; ENST00000514017:c.[569G>A]; ENST00000415130:c.[947G>A]; ENST00000323760:c.[1166G>A]; ENST00000348983:c.[947G>A]; ENST00000514555:c.[1076G>A]; ENST00000356505:c.[1076G>A]; ENST  
ENST00000512899:c.[595\_596insCT]; ENST00000513845:c.[\*504\_\*505insCT]; ENST00000448248:c.[595\_596insCT]  
ENST00000454913:c.[694\_695delAGinsGA]; ENST00000436289:c.[679\_680delAGinsGA]; ENST00000441998:c.[679\_680delAGinsGA]; ENST00000444811:c.[604\_605delAGinsGA]; ENST00000375429:c.[694\_695delAGinsGA]; ENST00000375  
ENST00000374712:c.[1236\_1237insC]; ENST00000374714:c.[1401\_1402insC]; ENST00000341947:c.[1479\_1480insC]; ENST00000457788:c.[1479\_1480insC]; ENST00000374713:c.[1338\_1339insC]; ENST00000395197:c.[1299\_1300insC]; EN  
ENST00000366920:c.[471\_472insA]; ENST00000544041:c.[471\_472insA]; ENST00000366919:c.[471\_472insA]; ENST00000392142:c.[471\_472insA]; ENST00000490904:c.[471\_472insA]; ENST00000348824:c.[471\_472insA]; ENST0000054295  
ENST00000515138:c.[1175C>A]; ENST00000239587:c.[1175C>A]  
ENST00000406875:c.[2791\_2792insC]; ENST00000342645:c.[2491\_2492insC]; ENST00000428878:c.[2710\_2711insC]  
ENST00000518592:c.[-383+11741G>A]; ENST00000325897:c.[52G>A]; ENST00000519846:c.[52G>A]; ENST00000522621:c.[52G>A]  
ENST00000436759:c.[2338C>T]; ENST00000357649:c.[2269C>T]; ENST00000354958:c.[2191C>T]; ENST00000354589:c.[2257C>T]; ENST00000527096:c.[2326C>T]; ENST00000356346:c.[2215C>T]; ENST00000322810:c.[2668C>T]; ENS  
ENST00000377765:c.[4440C>G]; ENST00000539465:c.[4440C>G]; ENST00000540557:c.[\*911-18444G>C]  
ENST00000338492:c.[621+2\_621+40delTGCCGTGGGGCAGGGCTGCCGTGGGGCAGGCACAGGGGC]; ENST00000368629:c.[390+2\_390+40delTGCCGTGGGGCAGGGCTGCCGTGGGGCAGGCACAGGGGC]; ENST00000368627:c.[390+2\_3  
ENST00000529681:c.[157G>A]; ENST00000447027:c.[157G>A]  
ENST00000298198:c.5\_6insG  
ENST00000393140:c.[313G>A]; ENST00000477603:c.[313G>A]; ENST00000393143:c.[313G>A]; ENST00000316227:c.[313G>A]  
ENST00000554448:c.[85delC]; ENST00000557634:c.[85delC]; ENST00000557098:c.[-45+970delC]; ENST00000554800:c.[85delC]; ENST00000556544:c.[85delC]; ENST00000298902:c.[85delC]; ENST00000444961:c.[85delC]; ENST000005  
ENST00000568210:c.[\*605C>T]; ENST00000568667:c.[754C>T]; ENST00000568273:c.[\*528C>T]; ENST00000569437:c.[721C>T]; ENST00000440863:c.[721C>T]; ENST00000566631:c.[\*389C>T]  
ENST00000565363:c.[364delG]; ENST00000563440:c.[229delG]; ENST00000262494:c.[490delG]; ENST00000562316:c.[229delG]; ENST00000262493:c.[490delG]  
ENST00000333870:c.[860C>G]; ENST00000574034:c.[\*144C>G]  
ENST00000358181:c.[5488+19C>G]; ENST00000449744:c.[466+19C>G]; ENST00000380358:c.[5767+19C>G]; ENST00000330494:c.[5590+19C>G]; ENST00000439235:c.[593C>G]; ENST00000573936:c.[547+19C>G]; ENST00000470531:c.  
ENST00000457167:c.[1461\_1462delGAinsTT]; ENST00000393892:c.[\*2832\_\*2833delTCinsAA]; ENST00000426588:c.[1293\_1294delGAinsTT]; ENST00000316603:c.[1293\_1294delGAinsTT]; ENST00000587727:c.[144\_145delGAinsTT]; ENST  
ENST00000393664:c.[492\_493insC]; ENST00000545089:c.[384-301\_384-300insC]; ENST00000591713:c.[492\_493insC]; ENST00000589898:c.[351-3173\_351-3172insG]; ENST00000545954:c.[375\_376insC]; ENST00000538265:c.[375\_376in  
ENST00000317932:c.[-15-45668T>C]; ENST00000579973:c.[-15-45668T>C]; ENST00000578973:c.[-206T>C]; ENST00000580059:c.[-206T>C]; ENST00000408011:c.[-16+1973T>C]; ENST00000580638:c.[-16+2811T>C]; ENST00000580  
ENST00000579973:c.[-15-45672T>G]; ENST00000580059:c.[-210T>G]; ENST00000578973:c.[-210T>G]; ENST00000580191:c.[10-45672T>G]; ENST00000580638:c.[-16+2807T>G]; ENST00000417602:c.[1615T>G]; ENST00000317932:c.  
ENST00000453954:c.[571-1delG]; ENST00000262965:c.[823-1delG]; ENST00000395423:c.[670-1delG]; ENST00000344749:c.[823-1delG]; ENST00000588136:c.[823-1delG]  
ENST00000344749:c.[823-2\_823-1delAGinsCA]; ENST00000395423:c.[670-2\_670-1delAGinsCA]; ENST00000588136:c.[823-2\_823-1delAGinsCA]; ENST00000262965:c.[823-2\_823-1delAGinsCA]; ENST00000453954:c.[571-2\_571-1delAG  
ENST00000342063:c.[82+108A>G]; ENST00000590316:c.[190A>G]  
ENST00000269703:c.[794G>A]; ENST00000601005:c.[794G>A]  
ENST00000397274:c.[3961G>A]; ENST00000595641:c.[3961G>A]; ENST00000594824:c.[3961G>A]; ENST00000595618:c.[3961G>A]  
ENST00000599906:c.[284A>C]; ENST00000595461:c.[461A>C]; ENST00000354959:c.[479A>C]; ENST00000598381:c.[461A>C]; ENST00000594012:c.[461A>C]  
ENST00000359596:c.[4076\_4077delGCinsCG]; ENST00000355481:c.[4076\_4077delGCinsCG]; ENST00000360985:c.[4076\_4077delGCinsCG]  
ENST00000301141:c.[1307A>G]; ENST00000601627:c.[117+42559T>C]  
ENST00000446844:c.[1261T>C]; ENST00000406070:c.[1243+18T>C]  
ENST00000592581:c.[268G>A]; ENST00000592844:c.[238+31817C>T]; ENST00000391958:c.[238+30G>A]; ENST00000334152:c.[590+30G>A]; ENST00000590668:c.[238+30G>A]; ENST00000589522:c.[238+30G>A]; ENST00000589799:c.[  
ENST00000597055:c.[344C>T]; ENST00000221538:c.[344C>T]  
ENST00000315396:c.705\_706insGCAG  
ENST00000433050:c.[1195C>T]; ENST00000332323:c.[1234C>T]; ENST00000301085:c.[271+3446C>T]; ENST00000432303:c.[142+4574C>T]  
ENST00000421239:c.1583G>A  
ENST00000541392:c.[35-33825A>C]; ENST00000336077:c.[946A>C]; ENST00000402254:c.[35-33825A>C]; ENST00000434419:c.[946A>C]; ENST00000538269:c.[35-33825A>C]; ENST00000291633:c.[1024A>C]; ENST00000396284:c.[35  
ENST00000300278:c.[2487delC]; ENST00000290239:c.[2487delC]; ENST00000356577:c.[2487delC]; ENST00000455528:c.[2487delC]; ENST00000381679:c.[2487delC]; ENST00000381692:c.[244+5339delC]  
ENST00000425018:c.[866\_867insCGA]; ENST00000248846:c.[4808\_4809insCGA]; ENST00000439308:c.[\*385\_\*386insCGA]

Amino.acid.change

ENSP00000367727:p.[Val660Met]; ENSP00000421433:p.[Val621Met]  
ENSP00000306522:p.[Ile1207fs]; ENSP00000402561:p.[Ile1207fs]; ENSP00000451720:p.[Ile163fs]  
ENSP00000355031:p.[Ser1012Leu]; ENSP00000366755:p.[Ser1021Leu]  
ENSP00000359018:p.[Ser141Gly]; ENSP00000359012:p.[Ser141Gly]; ENSP00000359011:p.[Ser141Gly]; ENSP00000432262:p.[Ser141Gly]; ENSP00000436835:p.[Ser141Gly]; ENSP00000433889:p.[Ser141Gly]  
ENSP00000354467:p.[Phe753fs]; ENSP00000443547:p.[Phe168fs]; ENSP00000418408:p.[Phe762fs]; ENSP00000431259:p.[Phe744fs]; ENSP00000376484:p.[Phe753fs]; ENSP00000386836:p.[Phe797fs]; ENSP00000432295:p.[Phe206fs]; ENSP00000357117:p.[Ala118Pro]; ENSP00000376083:p.[Ala118Pro]; ENSP00000376082:p.[Ala109Pro]; ENSP00000407616:p.[Ala118Pro]; ENSP00000357122:p.[Ala118Pro]; ENSP00000357120:p.[Ala109Pro]  
ENSP00000356579:p.His1726fs  
ENSP00000264448:p.[Ala3389Thr]; ENSP00000386627:p.[Ala3347Thr]  
ENSP00000442542:p.[Pro667fs]; ENSP00000318270:p.[Pro716fs]; ENSP00000385716:p.[Pro716fs]; ENSP00000318520:p.[Pro716fs]  
ENSP00000311684:p.Val2819fs  
ENSP00000391316:p.[Ala12Pro]; ENSP00000407375:p.[Ala12Pro]  
ENSP00000419202:p.[Val55Leu]; ENSP00000417376:p.[Val141Leu]; ENSP00000418896:p.[Val141Leu]; ENSP00000377717:p.[Val141Leu]; ENSP00000417201:p.[Val164Leu]; ENSP00000419987:p.[Val106Leu]  
ENSP00000347184:p.Pro745Ser  
ENSP00000426774:p.[Thr182Asn]; ENSP00000264956:p.[Thr182Asn]; ENSP00000372120:p.[Thr182Asn]  
ENSP00000349821:p.[Arg346His]; ENSP00000423525:p.[Arg190His]; ENSP00000392631:p.[Arg316His]; ENSP00000321656:p.[Arg389His]; ENSP00000345205:p.[Arg316His]; ENSP00000425470:p.[Arg359His]; ENSP00000348898:p.[Arg359His]  
ENSP00000421415:p.[Glu199fs]; ENSP00000404583:p.[Glu199fs]  
ENSP00000409389:p.[Arg232Glu]; ENSP00000414029:p.[Arg227Glu]; ENSP00000397914:p.[Arg227Glu]; ENSP00000388400:p.[Arg202Glu]; ENSP00000364578:p.[Arg232Glu]; ENSP00000364574:p.[Arg239Glu]  
ENSP00000363844:p.[Tyr413fs]; ENSP00000363846:p.[Tyr468fs]; ENSP00000339915:p.[Tyr494fs]; ENSP00000405520:p.[Tyr494fs]; ENSP00000363845:p.[Tyr447fs]; ENSP00000378623:p.[Tyr434fs]; ENSP00000355123:p.[Tyr387fs]; ENSP00000355887:p.[Asn160fs]; ENSP00000445018:p.[Asn160fs]; ENSP00000355886:p.[Asn160fs]; ENSP00000375986:p.[Asn160fs]; ENSP00000446303:p.[Asn160fs]; ENSP00000297332:p.[Asn160fs]  
ENSP00000424130:p.[Ala392Asp]; ENSP00000239587:p.[Ala392Asp]  
ENSP00000385571:p.[Ser931fs]; ENSP00000343108:p.[Ser831fs]; ENSP00000413724:p.[Ser904fs]  
ENSP00000325506:p.[Gly18Arg]; ENSP00000428402:p.[Gly18Arg]; ENSP00000428986:p.[Gly18Arg]  
ENSP00000388180:p.[Arg780Cys]; ENSP00000350277:p.[Arg757Cys]; ENSP00000347044:p.[Arg731Cys]; ENSP00000346602:p.[Arg753Cys]; ENSP00000434583:p.[Arg776Cys]; ENSP00000348702:p.[Arg739Cys]; ENSP00000323856:p.[Arg739Cys]  
ENSP00000366995:p.[Asp1480Glu]; ENSP00000444411:p.[Asp1480Glu]  
390+40delTGCCGTGGGGCAGGGCTGCCGTGGGGCAGGCACAGGGGC]  
ENSP00000436812:p.[Val53Met]; ENSP00000415793:p.[Val53Met]  
ENSP00000298198:p.Glu3fs  
ENSP00000376848:p.[Val105Met]; ENSP00000434370:p.[Val105Met]; ENSP00000376851:p.[Val105Met]; ENSP00000320948:p.[Val105Met]  
ENSP00000451370:p.[Leu30fs]; ENSP00000452560:p.[Leu30fs]; ENSP00000452495:p.[Leu30fs]; ENSP00000451875:p.[Leu30fs]; ENSP00000298902:p.[Leu30fs]; ENSP00000413536:p.[Leu30fs]; ENSP00000451987:p.[Leu30fs]; ENSP00000457853:p.[Arg252\*]; ENSP00000456051:p.[Arg241\*]; ENSP00000400312:p.[Arg241\*]  
ENSP00000454728:p.[Ala123fs]; ENSP00000455774:p.[Ala78fs]; ENSP00000262494:p.[Ala165fs]; ENSP00000457238:p.[Ala78fs]; ENSP00000262493:p.[Ala165fs]  
ENSP00000328061:p.Pro287Arg  
ENSP00000395252:p.Pro198Arg  
ENSP00000406463:p.[Asn488Tyr]; ENSP00000394327:p.[Asn432Tyr]; ENSP00000313311:p.[Asn432Tyr]; ENSP00000467702:p.[Asn49Tyr]  
ENSP00000377273:p.[Ser165fs]; ENSP00000465718:p.[Ser165fs]; ENSP00000440023:p.[Ser126fs]; ENSP00000443846:p.[Ser126fs]; ENSP00000321835:p.[Ser165fs]  
ENSP00000408405:p.Val540Ala  
ENSP00000408405:p.Ser539Ala

insCA]

ENSP00000466042:p.Met64Val  
ENSP00000269703:p.[Arg265Gln]; ENSP00000469866:p.[Arg265Gln]  
ENSP00000380444:p.[Ala1321Thr]; ENSP00000472915:p.[Ala1321Thr]; ENSP00000471367:p.[Ala1321Thr]; ENSP00000471457:p.[Ala1321Thr]  
ENSP00000469424:p.[Asn95Thr]; ENSP00000469645:p.[Asn154Thr]; ENSP00000347045:p.[Asn160Thr]; ENSP00000470275:p.[Asn154Thr]; ENSP00000469578:p.[Asn154Thr]  
ENSP00000352608:p.[Gly1359Ala]; ENSP00000347667:p.[Gly1359Ala]; ENSP00000354254:p.[Gly1359Ala]  
ENSP00000301141:p.Lys436Arg  
ENSP00000470856:p.Ser421Pro  
ENSP00000468154:p.Gly90Arg  
ENSP00000472630:p.[Thr115Ile]; ENSP00000221538:p.[Thr115Ile]  
ENSP00000318429:p.Pro236fs  
ENSP00000391358:p.[Arg399\*]; ENSP00000327538:p.[Arg412\*]  
ENSP00000459216:p.Arg528His  
ENSP00000336769:p.[Thr316Pro]; ENSP00000415758:p.[Thr316Pro]; ENSP00000291633:p.[Thr342Pro]  
ENSP00000300278:p.[Ser830fs]; ENSP00000290239:p.[Ser830fs]; ENSP00000348984:p.[Ser830fs]; ENSP00000399783:p.[Ser830fs]; ENSP00000371095:p.[Ser830fs]  
ENSP00000405979:p.[Leu288\_Glu289insAsp]; ENSP00000248846:p.[Leu1602\_Glu1603insAsp]

| Amino.acid.change.in.longest.transcript | Coding.region.change.in.longest.transcript                               | Other.variants.within.codon | Non.synonymous | Splice.effect                   |
|-----------------------------------------|--------------------------------------------------------------------------|-----------------------------|----------------|---------------------------------|
| ENSP00000367727:p.Val660Met             | ENST00000378466:c.1978G>A                                                | No                          | Yes            |                                 |
| ENSP00000306522:p.Ile1207fs             | ENST00000303635:c.3617delA                                               | No                          | Yes            |                                 |
| ENSP00000366755:p.Ser1021Leu            | ENST00000377532:c.3062C>T                                                | No                          | Yes            |                                 |
| ENSP00000359018:p.Ser141Gly             | ENST00000370001:c.421A>G                                                 | No                          | Yes            |                                 |
| ENSP00000271715:p.Phe806fs              | ENST00000271715:c.2414_2415insA                                          | No                          | Yes            |                                 |
| ENSP00000357122:p.Ala118Pro             | ENST00000368140:c.352G>C                                                 | No                          | Yes            |                                 |
| ENSP00000356579:p.His1726fs             | ENST00000367607:c.5167_5168insA                                          | No                          | Yes            |                                 |
| ENSP00000264448:p.Ala3389Thr            | ENST00000264448:c.10165G>A                                               | No                          | Yes            |                                 |
| ENSP00000318270:p.Pro716fs              | ENST00000317620:c.2145_2146insA                                          | No                          | Yes            |                                 |
| ENSP00000311684:p.Val2819fs             | ENST00000312358:c.8454_8455insC                                          | No                          | Yes            |                                 |
| ENSP00000407375:p.Ala12Pro              | ENST00000419783:c.33_34delGGinsCC                                        | No                          | Yes            |                                 |
|                                         | ENST00000265261:c.78-3006G>C                                             | No                          | Yes            |                                 |
| ENSP00000347184:p.Pro745Ser             | ENST00000355072:c.2233C>T                                                | No                          | Yes            |                                 |
| ENSP00000372120:p.Thr182Asn             | ENST00000382674:c.545C>A                                                 | No                          | Yes            |                                 |
| ENSP00000321656:p.Arg389His             | ENST00000323760:c.1166G>A                                                | No                          | Yes            |                                 |
| ENSP00000404583:p.Glu199fs              | ENST00000448248:c.595_596insCT                                           | No                          | Yes            |                                 |
| ENSP00000364578:p.Arg232Glu             | ENST00000375429:c.694_695delAGinsGA                                      | No                          | Yes            |                                 |
| ENSP00000339915:p.Tyr494fs              | ENST00000341947:c.1479_1480insC                                          | No                          | Yes            |                                 |
| ENSP00000375986:p.Asn160fs              | ENST00000392142:c.471_472insA                                            | No                          | Yes            |                                 |
| ENSP00000424130:p.Ala392Asp             | ENST00000515138:c.1175C>A                                                | No                          | Yes            |                                 |
| ENSP00000385571:p.Ser931fs              | ENST00000406875:c.2791_2792insC                                          | No                          | Yes            |                                 |
| ENSP00000428402:p.Gly18Arg              | ENST00000519846:c.52G>A                                                  | No                          | Yes            |                                 |
| ENSP00000323856:p.Arg890Cys             | ENST00000322810:c.2668C>T                                                | No                          | Yes            |                                 |
| ENSP00000444411:p.Asp1480Glu            | ENST00000539465:c.4440C>G                                                | No                          | Yes            |                                 |
|                                         | ENST00000338492:c.621+2_621+40delTGCCGTGGGGCAGGGCTGCCGTGGGGCAGGCACAGGGGC | No                          | -              | Possible splice site disruption |
| ENSP00000415793:p.Val53Met              | ENST00000447027:c.157G>A                                                 | No                          | Yes            |                                 |
| ENSP00000298198:p.Glu3fs                | ENST00000298198:c.5_6insG                                                | No                          | Yes            |                                 |
| ENSP00000376848:p.Val105Met             | ENST00000393140:c.313G>A                                                 | No                          | Yes            |                                 |
| ENSP00000451956:p.Leu30fs               | ENST00000555744:c.85delC                                                 | No                          | Yes            |                                 |
| ENSP00000400312:p.Arg241*               | ENST00000440863:c.721C>T                                                 | No                          | Yes            |                                 |
| ENSP00000262494:p.Ala165fs              | ENST00000262494:c.490delG                                                | No                          | Yes            |                                 |
| ENSP00000328061:p.Pro287Arg             | ENST00000333870:c.860C>G                                                 | No                          | Yes            |                                 |
|                                         | ENST00000380358:c.5767+19C>G                                             | No                          | Yes            |                                 |
|                                         | ENST00000393892:c.*2832_*2833delTCinsAA                                  | No                          | Yes            |                                 |
| ENSP00000321835:p.Ser165fs              | ENST00000319349:c.492_493insC                                            | No                          | Yes            |                                 |
| ENSP00000408405:p.Val540Ala             | ENST00000417602:c.1619T>C                                                | No                          | Yes            |                                 |
| ENSP00000408405:p.Ser539Ala             | ENST00000417602:c.1615T>G                                                | No                          | Yes            |                                 |
|                                         | ENST00000262965:c.823-1delG                                              | No                          | -              | Possible splice site disruption |
|                                         | ENST00000262965:c.823-2_823-1delAGinsCA                                  | No                          | -              | Possible splice site disruption |
|                                         | ENST00000342063:c.82+108A>G                                              | No                          | Yes            |                                 |
| ENSP00000269703:p.Arg265Gln             | ENST00000269703:c.794G>A                                                 | No                          | Yes            |                                 |
| ENSP00000471457:p.Ala1321Thr            | ENST00000595618:c.3961G>A                                                | No                          | Yes            |                                 |
| ENSP00000469578:p.Asn154Thr             | ENST00000594012:c.461A>C                                                 | No                          | Yes            |                                 |
| ENSP00000347667:p.Gly1359Ala            | ENST00000355481:c.4076_4077delGCinsCG                                    | No                          | Yes            |                                 |
| ENSP00000301141:p.Lys436Arg             | ENST00000301141:c.1307A>G                                                | No                          | Yes            |                                 |
| ENSP00000470856:p.Ser421Pro             | ENST00000446844:c.1261T>C                                                | No                          | Yes            |                                 |
| ENSP00000468154:p.Gly90Arg              | ENST00000592581:c.268G>A                                                 | No                          | Yes            |                                 |
| ENSP00000221538:p.Thr115Ile             | ENST00000221538:c.344C>T                                                 | No                          | Yes            |                                 |
| ENSP00000318429:p.Pro236fs              | ENST00000315396:c.705_706insGCAG                                         | No                          | Yes            |                                 |
| ENSP00000327538:p.Arg412*               | ENST00000332323:c.1234C>T                                                | No                          | Yes            |                                 |
| ENSP00000459216:p.Arg528His             | ENST00000421239:c.1583G>A                                                | No                          | Yes            |                                 |
|                                         | ENST00000538269:c.35-33825A>C                                            | No                          | Yes            |                                 |
| ENSP00000348984:p.Ser830fs              | ENST00000356577:c.2487delC                                               | No                          | Yes            |                                 |
|                                         | ENST00000439308:c.*385_*386insCGA                                        | No                          | Yes            |                                 |

| name.hg19.dbsnp146.all.variants | Homo.sapiens..hg19._Gene |
|---------------------------------|--------------------------|
| rs755716268                     | PANK4                    |
|                                 | CAMTA1                   |
| rs12750400                      | PER3                     |
| rs181722904                     | AKNAD1                   |
|                                 | POGZ                     |
|                                 | PYHIN1                   |
|                                 | CEP350                   |
| rs758464404                     | ALMS1                    |
|                                 | PROM2                    |
|                                 | SPEG                     |
|                                 | GPX1                     |
|                                 | ST3GAL6                  |
|                                 | HTT                      |
|                                 | EVC                      |
| rs537183556                     | CDC25C                   |
|                                 | C5orf60                  |
|                                 | NELFE                    |
|                                 | COL11A2                  |
|                                 | MAP3K4                   |
| rs373611883                     | TTLL2                    |
|                                 | HIPK2                    |
| rs770762643                     | CLVS1                    |
|                                 | PLEC                     |
|                                 | FRMPD1                   |
|                                 | DPYSL4                   |
| rs763022013                     | MUC5B                    |
|                                 | PGM2L1                   |
|                                 | PRIMA1                   |
|                                 | IFI27                    |
|                                 | ULK3                     |
|                                 | GNAO1                    |
|                                 | C17orf74                 |
|                                 | CHD3                     |
|                                 | DNAJC7                   |
|                                 | DHX8, ETV4               |
|                                 | KCTD1                    |
|                                 | KCTD1                    |
|                                 | TCF3                     |
|                                 | TCF3                     |
| rs775737691                     | C19orf35                 |
| rs767066474                     | CYP4F22                  |
| rs374157748                     | MYO9B                    |
|                                 | ZNF43                    |
|                                 | RYR1                     |
|                                 | CYP2A6                   |
| rs141117526                     | PSG7                     |
| rs750523558                     | ZNF233                   |
|                                 | RSPH6A                   |
|                                 | CCDC114                  |
| rs199880338                     | ZNF534                   |
| rs572149997                     | ZNF578                   |
|                                 | KIR2DL1                  |
|                                 | SON                      |
|                                 | TUBGCP6                  |
